# Supplementary material for: Polymer brush functionalized SiO2 nanoparticle based Nafion nanocomposites: a novel avenue to low-humidity proton conducting membranes
Source: Royal Society of Chemistry journal article supplement (doi:10.1039/c5py00514k), 2015-01-01
Supplement: c5py00514k1.pdf [file c5py00514k1.pdf]

## *Supporting Information*

# **Polymer-brush functionalized SiO<sub>2</sub> nanoparticles based Nafion nanocomposites: A novel avenue to low-humidity proton conducting membranes**

*Aleeza Farrukh,<sup>a c</sup> Fatima Ashraf,<sup>b</sup> Anke Kaltbeitzel,<sup>c</sup> Xiao Ling,<sup>c</sup> Manfred Wagner,<sup>c</sup> Hatice Duran,<sup>d</sup> Abdul Ghaffar,<sup>b</sup> Habib ur Rehman,<sup>a</sup> Sapun H. Parekh,<sup>c</sup> Katrin F. Domke,<sup>c</sup> and Basit Yameen<sup>\*† a</sup>*

<sup>a</sup> Department of Chemistry, SBA School of Science and Engineering, Lahore University of Management Sciences, Lahore-54792, Pakistan.

<sup>b</sup> Department of Chemistry, University of Engineering and Technology Lahore, Pakistan.

<sup>c</sup> Max-Planck-Institut für Polymerforschung, Ackermannweg 10-55128 Mainz, Germany.

<sup>d</sup> Department of Materials Science & Nanotechnology Engineering, TOBB University of Economics and Technology, Sogutozu Cad. 43, 06560 Ankara, Turkey.

<sup>†</sup>Laboratory of Nanomedicine and Biomaterials, Harvard Medical School, 75 Francis St., Boston, MA 02115, and The David H. Koch Institute for Integrative Cancer Research, Massachusetts Institute of Technology, Cambridge, MA 02139, USA.

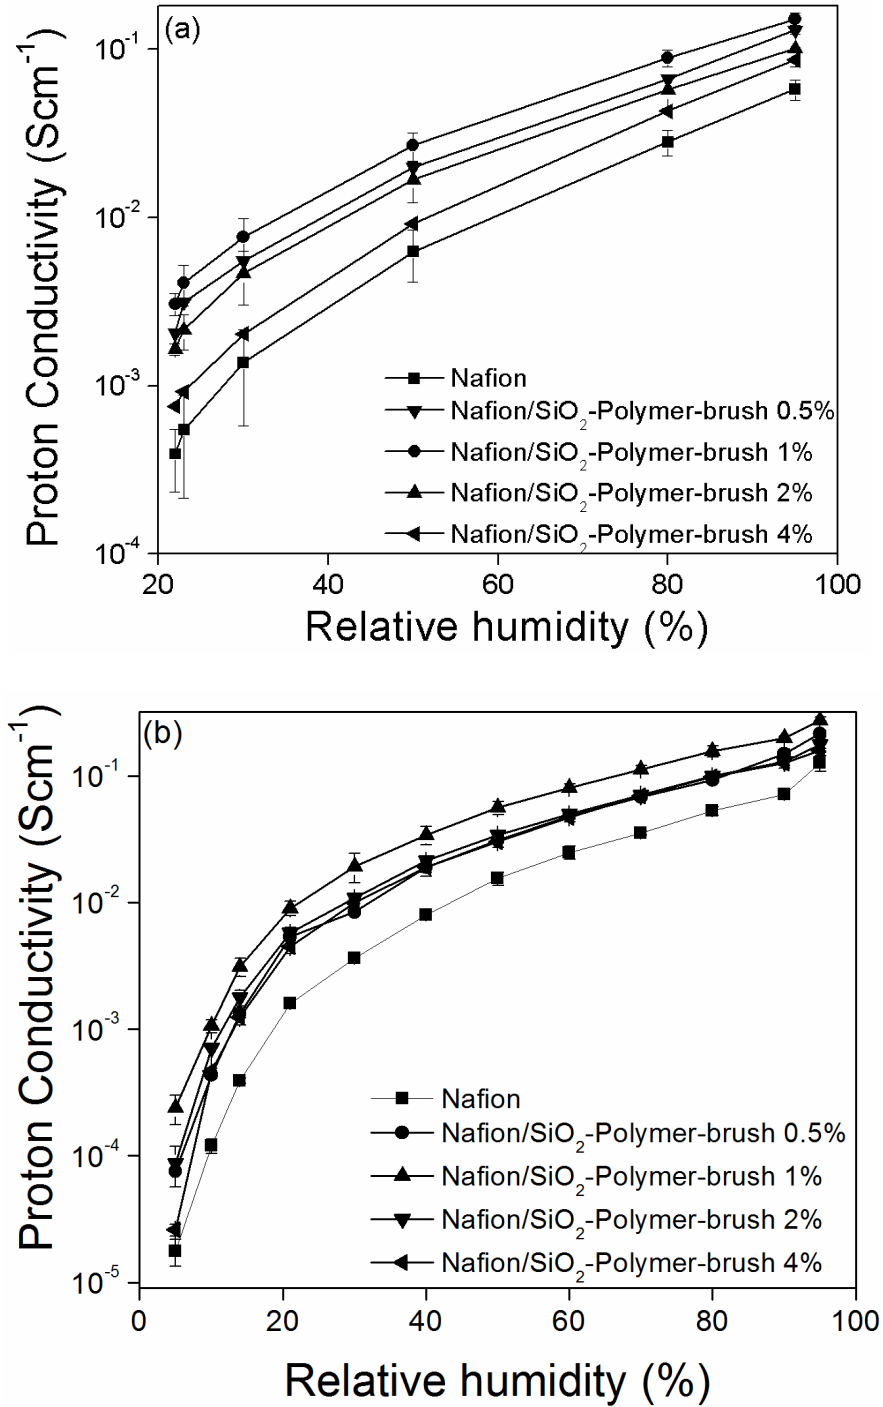

**Figure S1.** Influence of humidity on conductivity of different nanocomposite of Nafion and Nafion/SiO<sub>2</sub>-Polymer-brush nanocomposite PEMs at 25 °C (a) and at 55 °C (b).

| Polyelectrolyte<br>Electrolyte<br>Membranes (PEMs) | Proton Conductivity<br>(mScm <sup>-1</sup> ) at 25 °C |                 | Proton Conductivity<br>(mScm <sup>-1</sup> ) at 55 °C |                  |
|----------------------------------------------------|-------------------------------------------------------|-----------------|-------------------------------------------------------|------------------|
|                                                    | 20%<br>RH                                             | 80% RH          | 20% RH                                                | 80% RH           |
| Nafion                                             | 0.30<br>(±0.011)                                      | 24.5<br>(±4.03) | 1.59<br>(±0.049)                                      | 52.94<br>(±3.9)  |
| Nafion/SiO <sub>2</sub> -<br>Polymer-brush-1%      | 3.4<br>(±0.094)                                       | 95.4<br>(±5.22) | 9.03<br>(±1.17)                                       | 157.18<br>(±8.3) |
| Nafion/SiO <sub>2</sub> -1%                        | 2.34<br>(±0.088)                                      | 69.3<br>(±7.5)  | 2.67<br>(±1.14)                                       | 130<br>(±6.7)    |

**Table S1.** Proton conductivity data of PEMs at 25 and 55 °C under 20% and 80% relative humidity.

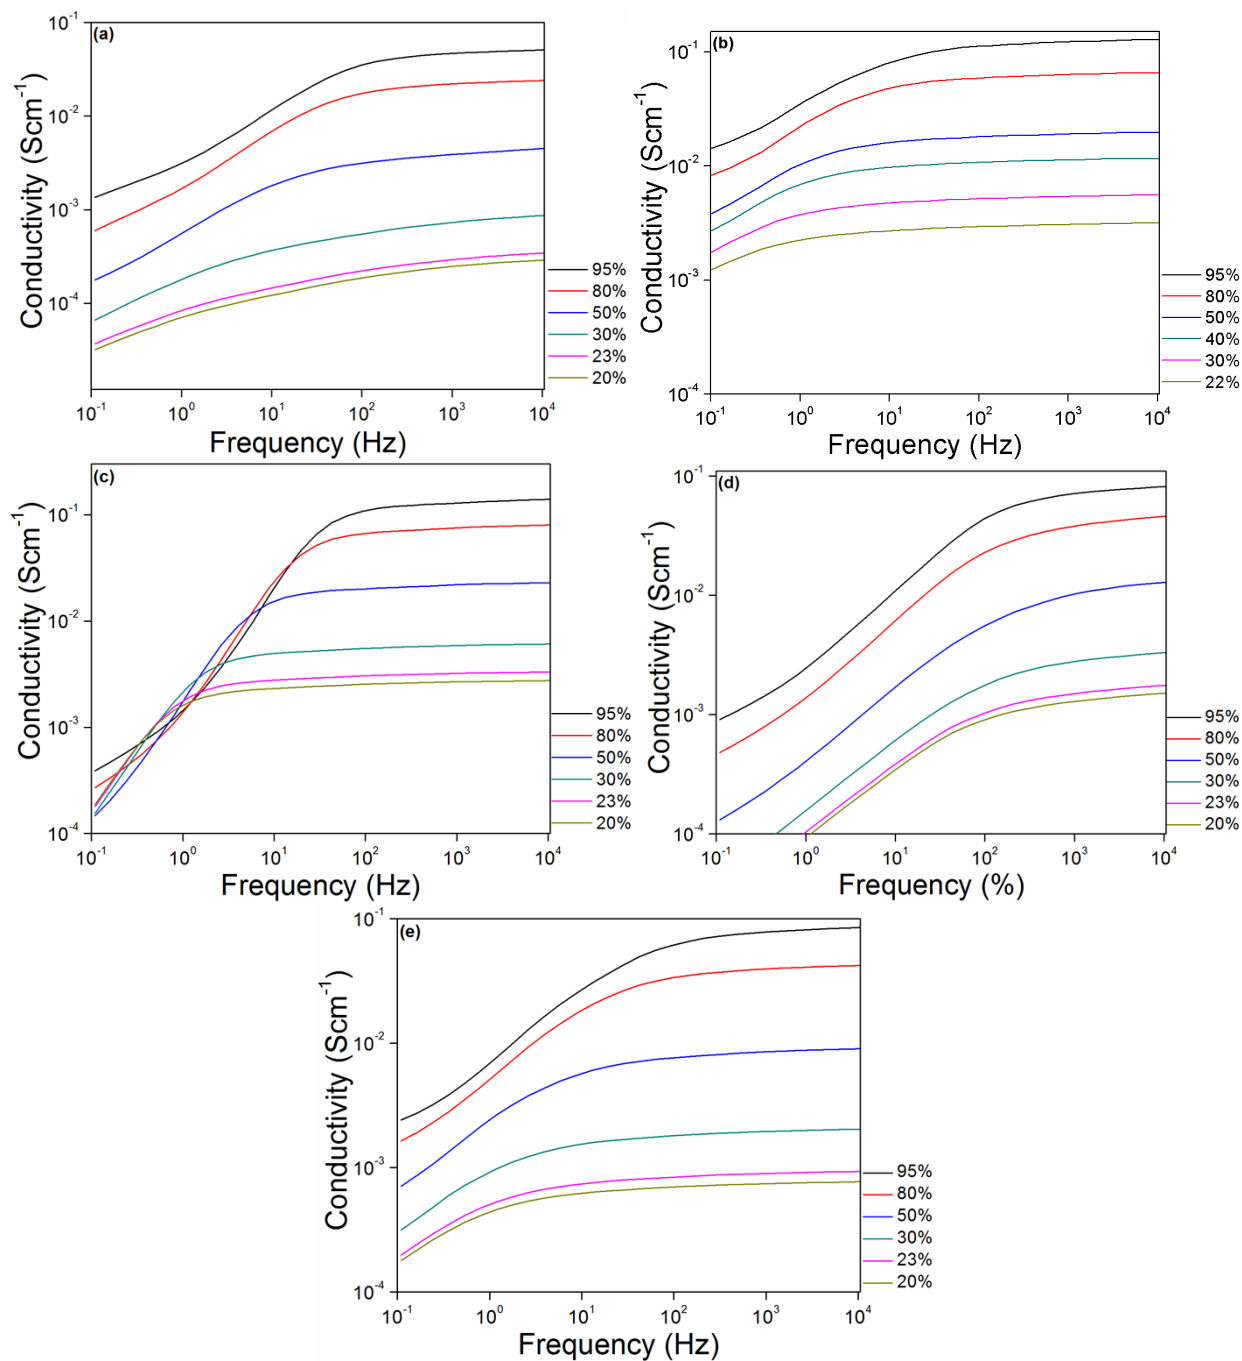

**Figure S2.** Bode plots at  $25^\circ\text{C}$ , Nafion reference (a), Nafion  $\text{SiO}_2$ -Polymer-brush 0.5% (b), 1% (c), 2% (d), and 4% (e) membranes.

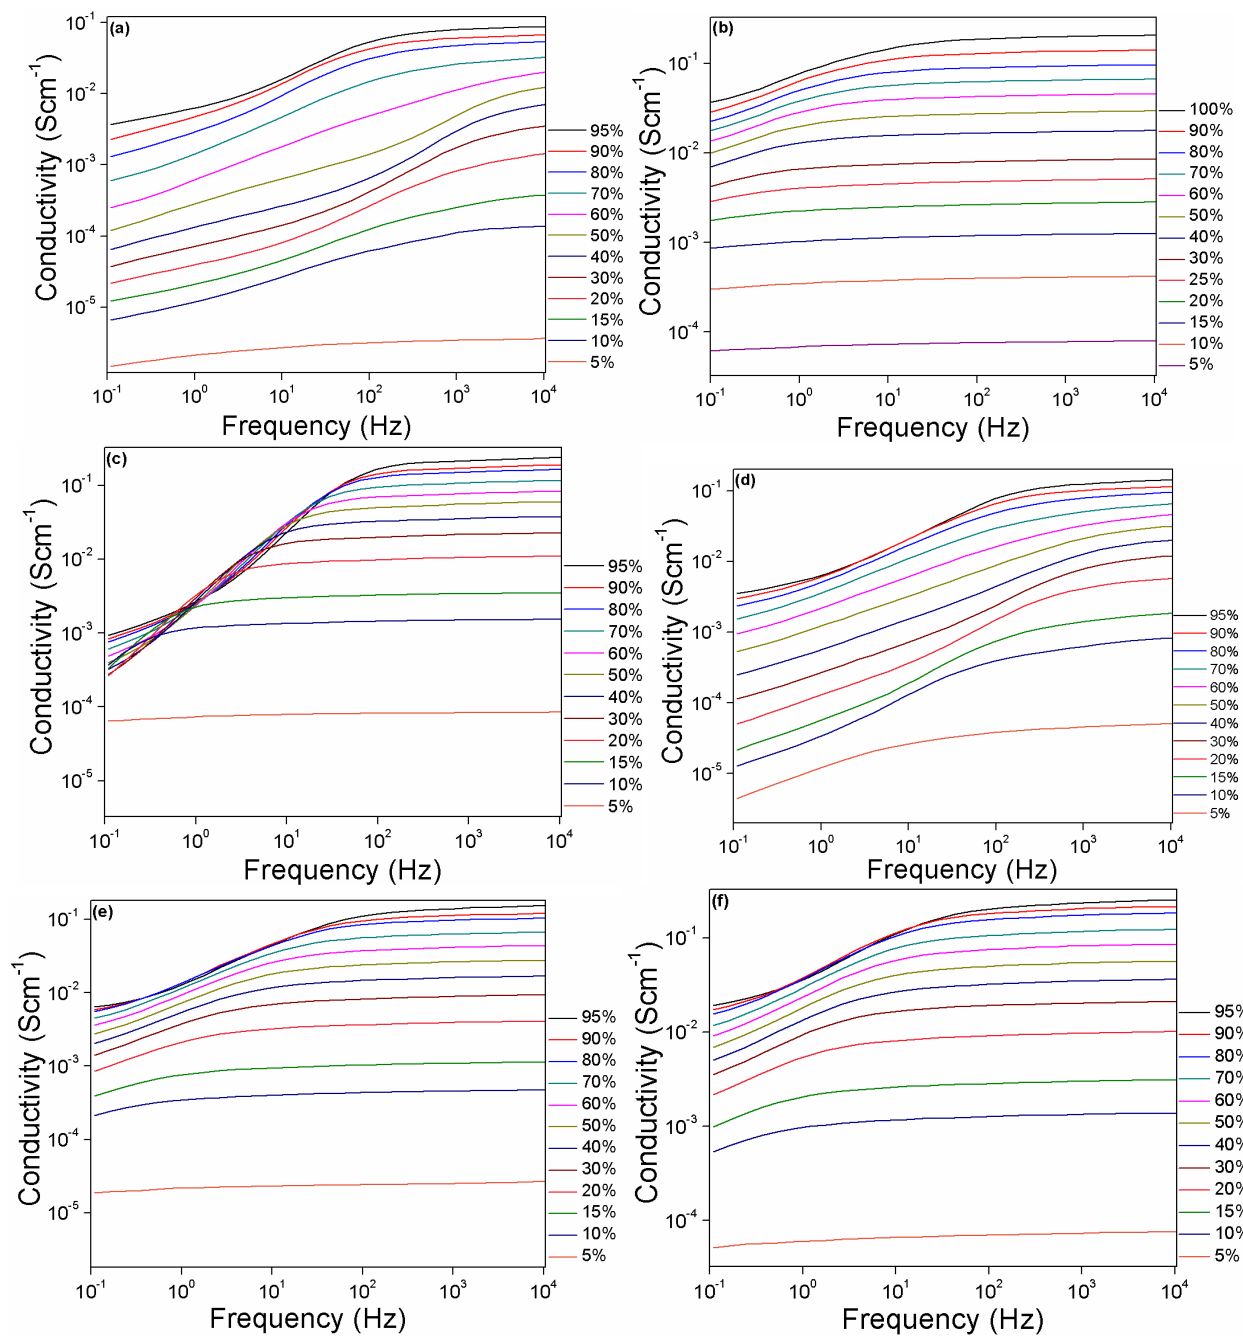

**Figure S3.** Bode plots at 55°C, Nafion reference (a), Nafion /SiO<sub>2</sub>-Polymer-brush 0.5% (b), 1% (c), 2% (d), 4% (e), and Nafion/SiO<sub>2</sub> 1% (f) membrane.

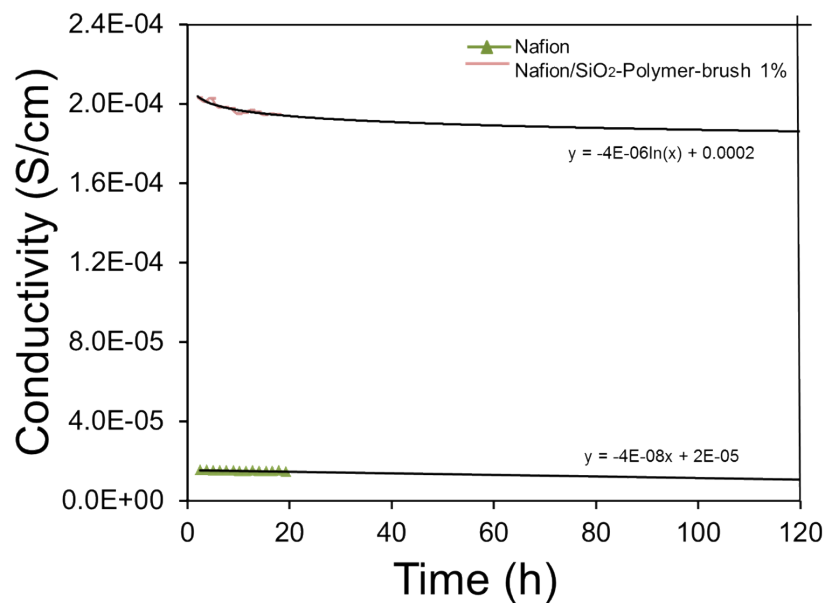

**Figure S4:** Stability of equilibrium proton conductivities as a function of time at 5% RH and 55°C.

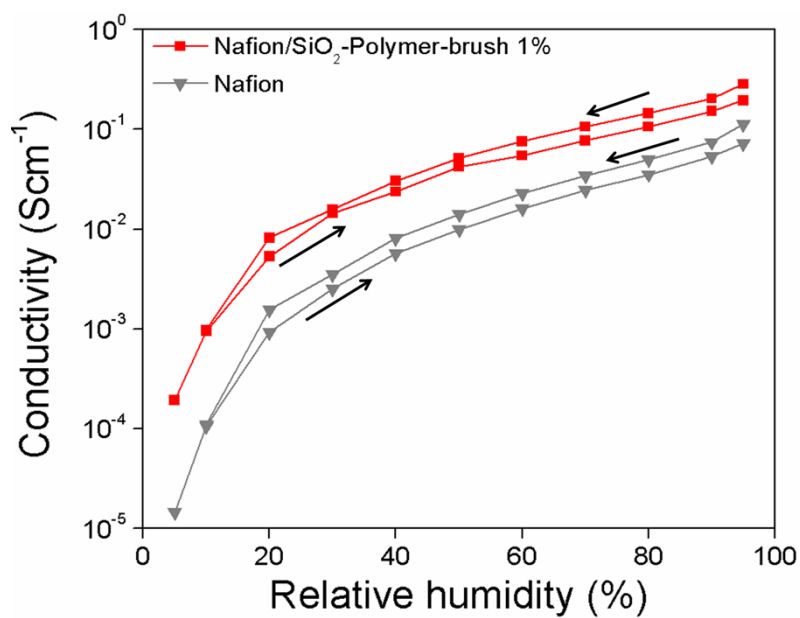

**Figure S5:** Proton conductivities as a function of increasing and decreasing RH (5%-95%) at 55°C.

| Membrane description                      | Activation energy (kJ/mole) 15% | Activation energy (kJ/mole) 50% | Activation energy (kJ/mole) 80% |
|-------------------------------------------|---------------------------------|---------------------------------|---------------------------------|
| Nafion/SiO <sub>2</sub> -polymer-brush 1% | 26.2                            | 15.9                            | 11.2                            |
| Nafion/ SiO <sub>2</sub>                  | 28.7                            | 15.6                            | 12.0                            |
| Nafion                                    | 40.0                            | 21.2                            | 15.1                            |

**Table S2:** Activation energies of proton conducting membranes used in this study.

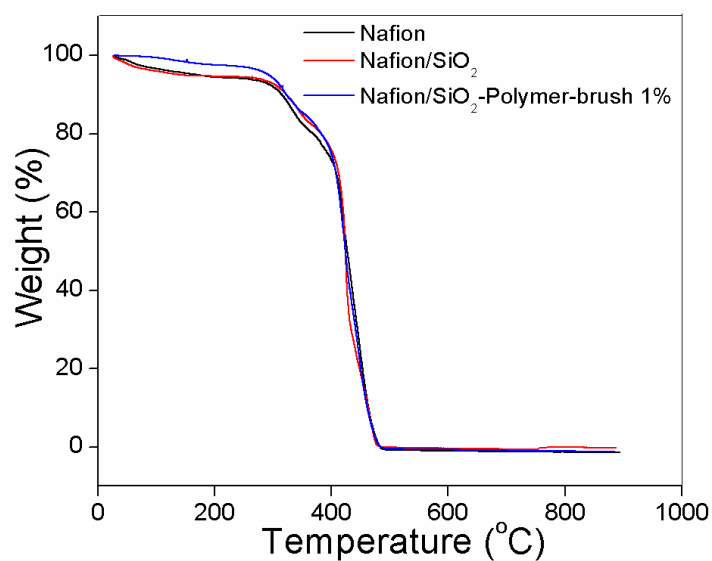

**Figure S6:** Thermogravimetric analysis (TGA) of proton conducting membranes used in this study.

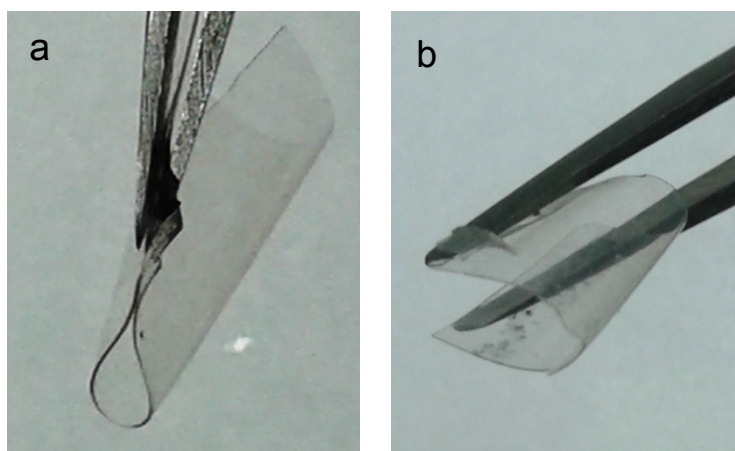

**Figure S7:** Demonstration of flexibility of fabricated membranes, Nafion (a) and Nafion/SiO<sub>2</sub>-Polymer-brush 1% (b).
